# Supplementary material for: Functionalised graphite felt anodes for enhanced power generation in membrane-less soil microbial fuel cells
Source: Royal Society of Chemistry journal article supplement (doi:10.1039/d2su00079b), 2023-01-01
Supplement: d2su00079b1.pdf [file d2su00079b1.pdf]

## Functionalised graphite felt anodes for enhanced power generation in membrane-less soil microbial fuel cells

Simran Kaur Dhillon<sup>1,2</sup>, Jakub Dziegielowski<sup>1</sup>, Patit Paban Kundu<sup>2\*</sup>, Mirella Di Lorenzo<sup>1\*</sup>

<sup>1</sup> Department of Chemical Engineering and Centre for Biosensors, Bioelectronics & Biodevices (C3Bio), University of Bath Claverton Down, BA2 7AY, UK

<sup>2</sup> Department of Chemical Engineering, Indian Institute of Technology, Roorkee, 247667, India

Corresponding authors: [m.di.lorenzo@bath.ac.uk](mailto:m.di.lorenzo@bath.ac.uk), [patit.kundu@ch.iitr.ac.in](mailto:patit.kundu@ch.iitr.ac.in)

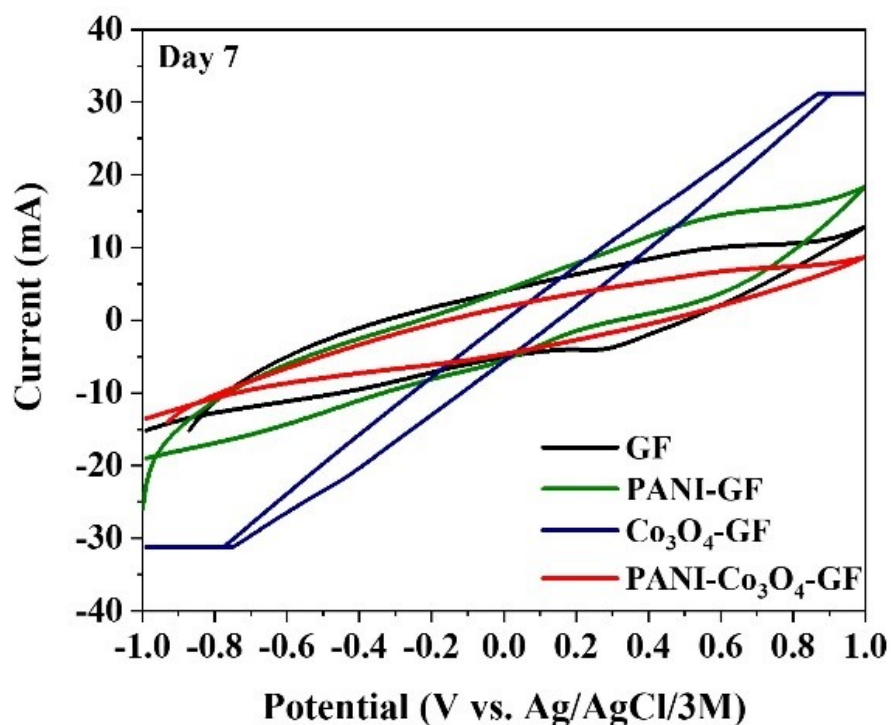

Figure S1. CV curves of all anodes after 1 week of study.

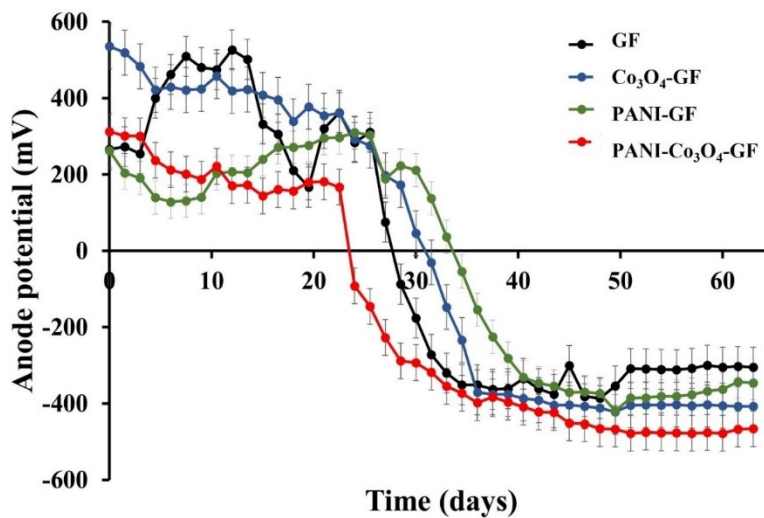

**Figure S2.** Anode potential evolution over time. The anodes were operated in SMFCs under an applied load of 510  $\Omega$ . Error bars refer to three replicates.

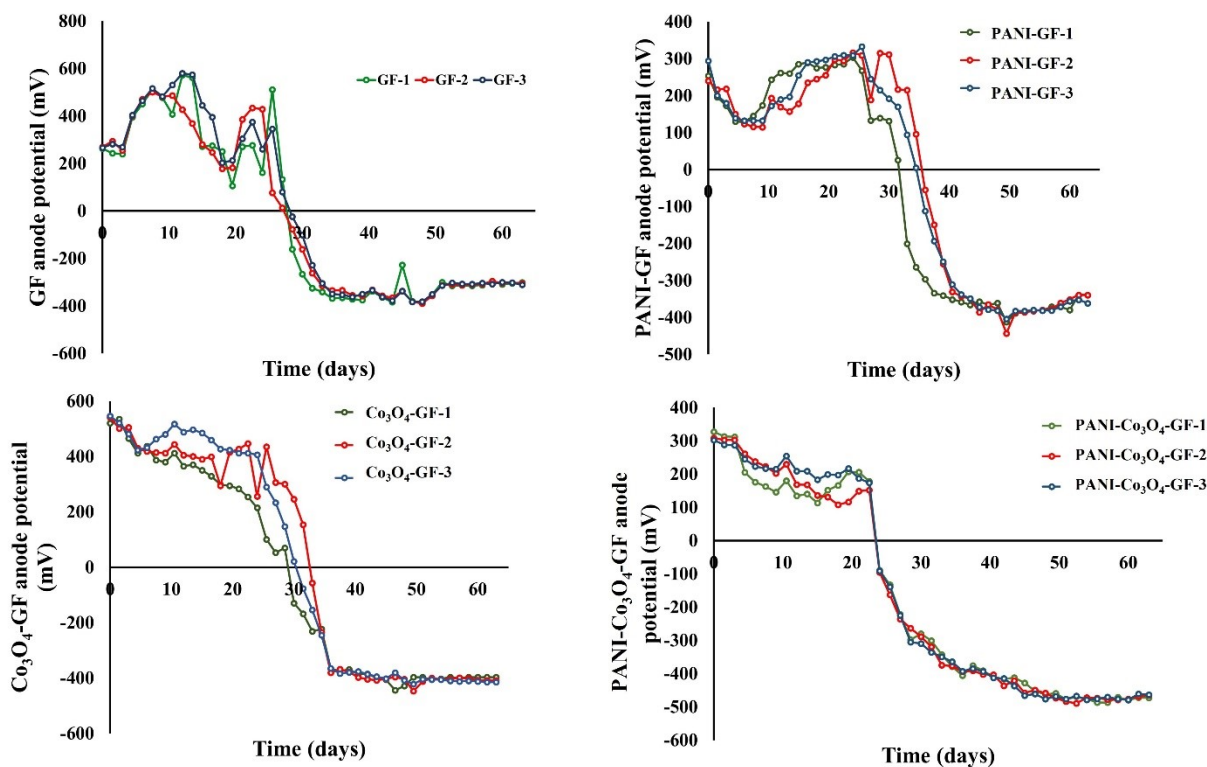

**Figure S3.** Anode potential with time for all anode replicates.

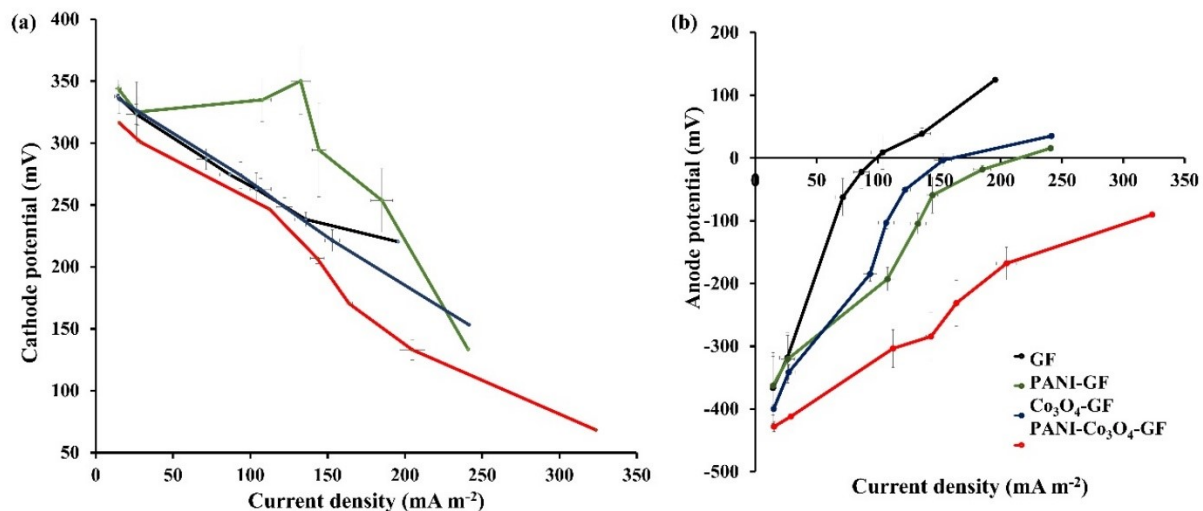

**Figure S4.** Electrode potential curves for cathode (a) and anode (b) in SMFCs obtained from polarization study on day 60.

**Table S1.** Elemental composition of PANI/Co<sub>3</sub>O<sub>4</sub>-GF composite anode electrode.

| Element          | Wt%         |
|------------------|-------------|
| C                | 76.60       |
| O                | 14.73       |
| Cl               | 0.10        |
| Fe               | 4.79        |
| Co               | 2.23        |
| Other impurities | 1.55        |
| <b>Total</b>     | <b>=100</b> |

**Table S2.** Optimal performance parameters at different time of SMFC operation.

| Day 7      |                |              |             |                                     |                                       |
|------------|----------------|--------------|-------------|-------------------------------------|---------------------------------------|
| Parameters | Resistance (Ω) | OCV (mV)     | CCV (mV)    | Power density (mW m <sup>-2</sup> ) | Current density (mA m <sup>-2</sup> ) |
| <b>GF</b>  | 5000           | 665.9 ± 38.8 | 416.6 ± 104 | 7.4 ± 3.5                           | 17.0 ± 52.5                           |

|                                            |      |              |              |             |              |
|--------------------------------------------|------|--------------|--------------|-------------|--------------|
| <b>PANI-GF</b>                             | 700  | 303.4 ± 80.2 | 169.3 ± 28.9 | 8.5 ± 2.7   | 49.35 ± 8.4  |
| <b>Co<sub>3</sub>O<sub>4</sub>-GF</b>      | 1000 | 409.4 ± 105  | 334.4 ± 18.4 | 22.8 ± 2.4  | 68.23 ± 3.7  |
| <b>PANI-Co<sub>3</sub>O<sub>4</sub>-GF</b> | 500  | 381.1 ± 66.8 | 246.2 ± 8.9  | 24.8 ± 1.8  | 100.49 ± 3.6 |
| <b>Day 30</b>                              |      |              |              |             |              |
| <b>GF</b>                                  | 700  | 734.1 ± 33.7 | 239.3 ± 20.8 | 16.8 ± 2.9  | 69.8 ± 6.1   |
| <b>PANI-GF</b>                             | 1000 | 744.6 ± 12.6 | 412.2 ± 60   | 35.2 ± 10.1 | 84.1 ± 12.2  |
| <b>Co<sub>3</sub>O<sub>4</sub>-GF</b>      | 700  | 743.3 ± 5.4  | 449.1 ± 11.7 | 58.8 ± 3.1  | 130.9 ± 3.4  |
| <b>PANI-Co<sub>3</sub>O<sub>4</sub>-GF</b> | 500  | 788.0 ± 3.4  | 366.2 ± 12   | 54.8 ± 3.5  | 149.5 ± 4.9  |
| <b>Day 60</b>                              |      |              |              |             |              |
| <b>GF</b>                                  | 300  | 807.7 ± 5.5  | 199.6 ± 14.0 | 27.2 ± 3.7  | 135.8 ± 9.5  |
| <b>PANI-GF</b>                             | 700  | 792.1 ± 33.6 | 454.7 ± 19.4 | 60.4 ± 5.1  | 132.6 ± 5.6  |
| <b>Co<sub>3</sub>O<sub>4</sub>-GF</b>      | 1000 | 798.3 ± 34   | 458.8 ± 3.9  | 42.9 ± 0.7  | 93.6 ± 0.8   |
| <b>PANI-Co<sub>3</sub>O<sub>4</sub>-GF</b> | 700  | 770.4 ± 35.1 | 491.4 ± 5.1  | 70.4 ± 1.4  | 143.2 ± 1.4  |

(Data are the average of three replicates)
